# Supplementary material
Source: publisher figshare collection journal article supplement (https://sage.figshare.com/ndownloader/files/22366047)
Supplement: Supplementary file 1 [file 22366047]

## Sheet: Sheet1
Question:	Responses:
Specialty	Pulmonary: 56%	Rheumatology: 44%
Years in practice	< 5 yr: 61%	5-9 yr: 6%	10-20 yr: 11%	>20 yr: 22%
What percentage of SSc patients do you see?	< 5%: 72%	5-10%: 28%
Does early detection change outcomes?	yes: 72%	data is inconclusive: 28%
What are the benefits of screening for PAH?	"Improves mortality": 50%	"Does not change mortality but improves morbidity": 50%
What are current screening recommendations? (select all that apply)	ACR 2013: 33%	DETECT: 11%	ESC/ERC: 28%	ASIG: 22%	"Screening only indicated when patient has sx or high clinical suspiscion": 11%
What is your practice regarding PAH screening in SSc	"Offered to all patients": 72%	"Offer only to those who ask or are high risk": 28%
How often should you screen for PAH?	Yearly: 78%	"Only in those with clinical sx or high suspiscion": 22%
Are all screening algorithms equal?	No: 61%	Unsure: 39%
What are the main hurdles to screening in our health system? (select all that apply)	Difficulty ordering tests: 44%	Difficulty with Insurance coverage:44%	Limited resources/financial limitations: 44%
Who should be responsible for screening?	All: 17%	Pulmonary: 33%	Rheumatology: 44%	Pulmonary and Rheumatology: 6%
Any reservations about guidelines?	No: 89%	"Guidelines do not apply to my patient population": 6%	"Too early to implement guidelines given lack of clear evidence": 6%

## Sheet: Survey Data Summary
	No./Total	Percentage
Knew PAH Screening Changed Outcomes	13/18	0.722222
Knew PAH Screening Improved Mortality	9/18	0.5
Knew Minimal Screening Guidelines	12/18	0.666667
Knew Appropriate Screening Population	13/18	0.722222
Knew Appropriate Screening Interval	14/18	0.777778
Identified "Difficulty Ordering" as Physician-Level Hurdle to Screening	8/18	0.444444
Identified "Difficulty with Insurance Coverage" as Physician-Level Hurdle of Screening	6/18	0.333333
Identified Perception of "Financial Limitations" as Physician-Level Hurdle of Screening	8/18	0.444444
